1  
2  
3  
4  
5  
6  
7  
8  
9  
10  
11  
12  
13  
14  
15  
16  
17  
18  
19  
20  
21

## Original Article

# Rhizome trait scaling relationships are modulated by growth conditions and are linked to plant fitness

Dinesh Thakur<sup>1</sup> and Zuzana Münzbergová<sup>1,2</sup>

<sup>1</sup>Institute of Botany, Czech Academy of Sciences, Czech Republic

<sup>2</sup>Department of Botany, Faculty of Science, Charles University, Prague, Czech Republic

Author e-mail: [552.dinesh@gmail.com](mailto:552.dinesh@gmail.com) and [zuzmun@natur.cuni.cz](mailto:zuzmun@natur.cuni.cz)

### AUTHOR CONTRIBUTIONS:

ZM owned the original data used in this study. DT and ZM conceived the idea and conceptualised the study. DT analysed the data with help from ZM. DT wrote the draft of the paper with in-depth suggestions, inputs and editing from ZM. Both the authors approved the final version of the manuscript.

### ACKNOWLEDGEMENTS

We thank the POPEKOL discussion group for useful comments on the manuscript. The study was supported partly by the project GACR 19-00522S and partly by institutional research projects RVO 67985939 and MSMT. We also thank Vigdis Vandvik and her team for granting access to the SEEDCLIM climate grid from where the initial material had been obtained and Věroslava Hadincová for her help with the collection of the initial data.

22 **ABSTRACT**

23 **Background and Aim:** Rhizomes are important organs allowing many clonal plants to persist  
24 and reproduce under stressful climates with longer rhizomes indicating enhanced ability of  
25 the plants to spread vegetatively. We do not however, know either how rhizome construction  
26 costs change with increasing length or vary with environmental conditions.

27 **Methods:** We analysed the rhizome length vs mass scaling relationship, the plasticity in the  
28 scaling relationships, their genetic basis, and how scaling relationships are linked to plant  
29 fitness. We used data from 275 genotypes of a clonal grass *Festuca rubra* originating from 11  
30 localities and cultivated under four contrasting climates. Data were analysed using standard  
31 major axis regression, mixed-effect regression models and a structural equation model.

32 **Key Results:** Rhizome construction costs increased (i.e., lower specific rhizome length) with  
33 increasing length. The trait scaling relationships were modulated by cultivation climate and  
34 its effects also interacted with the climate of origin of the experimental plants. With  
35 increasing length, increasing moisture led to a greater increase in rhizome construction costs.  
36 Plants with lower rhizome construction costs showed significantly higher fitness.

37 **Conclusions:** This study suggests that rhizome scaling relationships are plastic, but also show  
38 genetic differentiation and are linked to plant fitness. Therefore, to persist under variable  
39 environments modulation in scaling relationships could be an important plants' strategy.

40 **Key words:** Allometry; Clonal grass; Climate change; Plasticity; Resource allocation

41

## 42 INTRODUCTION

43 Plants optimise the allocation of limited resources to different plant parts to increase  
44 growth, survival and reproduction in a given environment (Reich et al., 1997; Wright et al.,  
45 2004; Díaz et al., 2016). Changes in environmental conditions may thus modify the allocation  
46 patterns via resource trade-offs, which, eventually, affect allocation to organs representing  
47 fitness, e.g., reproductive organs or total biomass (Springate and Kover, 2014; Halbritter et  
48 al., 2018). Elucidating the patterns of allocation and determining factors that cause changes in  
49 resource allocation patterns are, therefore, critical for understanding plant carbon economics  
50 and, hence, plant functioning and persistence (long term survival) under current and future  
51 climates.

52 To explore allocation strategies and developing plant economic spectra, trait scaling  
53 relationships are very important (Wright et al., 2004; Niklas et al., 2007; Enquist et al., 2015).  
54 In the last two decades, the use of these relationships in ecological research has greatly  
55 enhanced our understanding of how resources are allocated in different plant parts, such as,  
56 leaves, twigs or stems (Niklas et al., 2007; Fajardo, 2016; Husáková et al., 2018; Deng et al.,  
57 2020). The basic expectation behind the scaling relationships is that the various traits are not  
58 independent but, rather, are linked to other traits via trade-offs (Reich 2014). Based on the  
59 scaling relationships among various plant traits, a range of studies have demonstrated that  
60 allocation to some plant functions increases with increasing size (e.g., increased leaf  
61 construction cost for larger leaves (Niklas et al., 2007); increased investment into the stem  
62 relative to the leaves for larger trees (Poorter et al., 2015)). This indicates that plants allocate  
63 disproportionately more resources into specific plant functions with changes in size (Poorter  
64 et al., 2015).

65 Most studies on trait scaling relationships in plants deal with leaf traits (e.g., Reich et  
66 al., 1997, Wright et al., 2004, Niklas et al., 2007, Milla and Reich, 2007), with fewer studies

67 dealing with stem traits (Poorter et al., 2015), root traits (Chen et al., 2019; Deng et al., 2020)  
68 and plant biomass fractions (above-ground and below-ground) (Niklas and Enquist, 2001;  
69 Husáková et al., 2018). There is, however, no such information for rhizomes and Goldberg et  
70 al., (2020) recently highlighted the strong need to understand the allocation of resources to  
71 clonal growth in plants.

72 Rhizomes are ecologically important plant organs responsible for vegetative spread in  
73 many plant species (Klimešová and De Bello, 2009; Duchoslavová and Jansa, 2018), with  
74 increased importance in stressful climates, for example, above the tree-line (Billings and  
75 Mooney, 1968; Körner, 2003). Rhizomes form bud banks (Ott et al., 2019) and enable  
76 species persistence by tolerating extreme conditions (e.g. very low or high temperatures or  
77 flooding) and promoting rapid growth during favourable seasons (since they also act as  
78 storage organs) (Billings and Mooney, 1968; Hull, 2008; Kinmonth-Schultz and Kim, 2011).  
79 Rhizomes also have important roles in processes such as below-ground carbon sequestration  
80 (De Deyn et al., 2008), community assembly (Weiher et al., 1998) and plant community  
81 resilience to disturbances (Hull, 2008; Speed et al., 2010).

82 The length of the rhizome per unit dry mass investment (i.e., specific rhizome length  
83 ( $SR_L = \text{rhizome length} / \text{dry mass}$ )) is a key trait indicative of costs of vegetative spread.  
84 Specific rhizome length was shown to vary with nutrient availability (Ye et al., 2006) and  
85 rhizome burial and breakage (Balestri and Lardicci 2014). Based on patterns reported in the  
86 literature on scaling relationships among above-ground traits (e.g., Reich et al., 1997, Wright  
87 et al., 2004, Niklas et al., 2007, Milla and Reich, 2007), the construction costs of rhizomes  
88 with increasing length can increase, decrease or be independent of their length. We are,  
89 however, not aware of any study distinguishing between these scenarios. Such knowledge is  
90 nonetheless important and has implications in understanding the ability of clonal plants to  
91 spread vegetatively and grow.

92           Climate is a major driver of plant functioning with vast literature on patterns, causes  
93 and consequences of functional trait variation along climatic gradients. By contrast, little is  
94 known about the effects of climate on trait scaling relationships (Vasseur et al., 2018).  
95 Specifically, earlier studies analysing variation in scaling relationships due to climatic factors  
96 (e.g., Xiang et al., 2013; Fajardo, 2016; Klimešová et al., 2017; Thakur et al., 2019) have not  
97 separated the effects of specific environmental factors on these relationships. This might be  
98 because the majority of the earlier studies was carried out in very complex natural  
99 environments where multiple factors (e.g., soil properties, climate, and genetic changes) act  
100 at the same time. We thus need experimental studies to disentangle the role of each factor  
101 separately.

102           In addition to allowing the separation of the effects of single environmental factors,  
103 the great advantage of experimental studies is that they allow assessment of the specific  
104 mechanisms determining the scaling relationships. Specifically, by studying plants from  
105 different original conditions cultivated under different environmental conditions, it is possible  
106 to assess the relative importance of genetic differentiation and phenotypic plasticity in  
107 determining the scaling relationships. Genetic differentiation has a role in the generation and  
108 maintenance of biodiversity and, thereby, insight into the evolutionary processes and the  
109 adaptive divergence of populations may be gained (Weiher et al., 1998). On the other hand,  
110 phenotypic plasticity allows individual organisms to develop the appropriate traits that are  
111 better suited to the particular environment that they encounter (Yan et al., 2013). While  
112 studies separating these effects in terms of plant performance are common (e.g.,  
113 (Münzbergová et al., 2017; Datta et al., 2017; Manzanedo et al., 2019), studies doing so in  
114 terms of trait scaling relationships are rare (but see Vasseur et al., 2018)).

115           Changes in trait values such as in specific root length (Kramer-Walter et al., 2016),  
116 specific leaf area (Liu et al., 2016) and rhizome density (Meyer and Schmid, 1999) have been

117 shown to affect carbon allocation and thus be linked to whole plant fitness. Similarly,  
118 Vasseur et al., (2018) demonstrated that changes in trait scaling relationships may also lead to  
119 changes in carbon use and thus to changes in plant fitness. The effects of scaling relationships  
120 on fitness may also depend on environmental conditions determining the resource use  
121 efficiency of the plants (Anderson, 2016; Mota et al., 2018). Our knowledge on the effects of  
122 the scaling relationships on fitness and its changes within a changing environment is,  
123 however, still very limited.

124 To fill the above-mentioned gaps in our knowledge, we aim to understand rhizome  
125 length vs mass scaling relationships, in general, in order to test the effect of climate (the  
126 original and cultivation, representing genetic differentiation and phenotypic plasticity) on  
127 these relationships and explore how these relationships are related to plant fitness. Using  
128 *Festuca rubra* as a model plant, we addressed the following questions: (1) How do rhizome  
129 length and mass scale with each other? (2) Do trait relationships change with changes in  
130 temperature and moisture of growth conditions and plant origin? (3) Are rhizome trait scaling  
131 relationships linked to plant fitness?

132 We hypothesise that as with leaf trait scaling relationships, the rhizome length will  
133 fail to keep pace with increasing mass. We expect that the scaling relationships will vary with  
134 growth conditions, as a result of which the plants growing in warmer and wetter climates  
135 should have a lower rate of increase in tissue construction costs (because there is no thermal  
136 or water limitation). We also hypothesise that the trait relationships differ between plants  
137 from different original climates. Additionally, it is expected that lower rhizome construction  
138 cost in longer rhizomes would lead to higher plant fitness.

## 139 **MATERIALS AND METHODS**

### 140 *Study species and system*

141           The data used in this study are from Münzbergová et al., (2017) on a widespread  
142 clonal grass *Festuca rubra* L. It is distributed in temperate to tundra regions in both  
143 hemispheres as well as in tropical mountains (GBIF.org 2021, accessed on 07/03/2021). It  
144 reproduces vegetatively by forming both intra-vaginal and extra-vaginal tillers on rhizomes,  
145 but also reproduces by seeds (Münzbergová et al., 2017). While reproducing vegetatively,  
146 this species varies in the growth form and, consequently, resource capture strategies, creating  
147 a continuum of forms between 'phalanx' and 'guerilla' strategy (Skálová et al., 1997).  
148 Opposite to the 'guerilla' strategy, the 'phalanx' strategy is characterised by a decrease in the  
149 length of rhizome internodes and a greater rate of branching (Lopez et al., 1994). The  
150 'phalanx' strategy is adopted in resource-rich environments while the 'guerilla' strategy is  
151 favoured in resource-poor conditions (Skálová et al., 1997).

152           The dataset used represented trait values of 275 genotypes (the genotype  
153 identification method is given in Šurinová et al., 2019) collected from 11 localities (25  
154 genotypes per locality). These localities are part of a climatic grid (the SeedClim Grid) of  
155 factorially-crossed temperature and precipitation gradients in western Norway (see details in  
156 Klanderud et al., 2015). All these genotypes were cultivated in four growth chambers (Votch,  
157 2014), simulating the climatic conditions of extreme localities of the climate grid (cold/warm  
158 combined with dry/wet, (with circles in Figure 1) resulting in 11 localities  $\times$  25 genotypes  $\times$  4  
159 climates, (i.e., 1100 individuals) were grown in the experiment. The conditions in the growth  
160 chambers mimic the spring to summer climate of each population in the field (the second half  
161 of April to the second half of June). Prior to cultivation, the plants were grown in a common  
162 climate for about seven months in total (four months in the garden and three months in the  
163 greenhouse) to remove most of the transgenerational effects (Münzbergová et al., 2017; see  
164 also Münzbergová et al., 2019).

165

166 *Growth conditions*

167           The temperature in each the growth chambers followed the course of temperatures at  
168 the simulated natural locality (for details, see Münzbergová et al., 2017). The moisture level  
169 in the growth chambers was monitored as soil moisture using TMS dataloggers (Wild et al.,  
170 2019) (three inside each chamber) and then adding the necessary amount of water to mimic  
171 the soil moisture of the natural localities (also monitored using the TMS dataloggers). Each  
172 data-logger was placed in a pot with a growing *Festuca* plant identical to the experimental  
173 plants, but which was not a part of the experiment (not used for any other measurements). In  
174 the climate chambers with dry conditions, plants were watered with about 20 mL of tap water  
175 per plant, applied to the trays if the soil moisture was lower than 15%. In the wet regime,  
176 plants were cultivated under full soil saturation with ~1.5 cm water level in the tray. By  
177 manipulating the soil moisture in the growth chambers, we are mimicking soil moisture at  
178 localities with a certain precipitation level. We thus refer to the moisture conditions in the  
179 growth chamber as precipitation values of the simulated localities. Day length and radiation  
180 levels were also controlled in a manner that these mimic the conditions of the original  
181 localities (more details in Münzbergová et al., 2017).

182           Some studies suggest that performing experiments in growth chambers lead to  
183 pseudo-replication of the experiment (Hurlbert, 1984). This argumentation has been later  
184 refuted as non-justified (e.g., Oksanen, 2001; Johnson et al., 2016). Most importantly, even  
185 Hurlbert (2004) stated that such a setting is not a problem in cases when the main focus is not  
186 on the main effects of the chamber climate, but on any interactive effects, such as the rhizome  
187 scaling relationships in our case (see (Münzbergová et al., 2017) for an extended discussion  
188 of the issue).

189

190 *Plant cultivation*



191           The experiment ran from the end of February to the end of August 2015. The  
192 experiment was initiated by planting a single ramet without any rhizomes and with roots  
193 developed in water over three weeks prior to planting into each pot. Thanks to this, all below-  
194 ground structures of the experimental plants were of identical age.

195           In mid-June 2015, all the above-ground parts were cut to 3 cm to simulate mowing in  
196 natural conditions. After the final harvest in August 2015, we separated the plants into above-  
197 ground and below-ground parts; the below-ground parts were carefully sorted into roots and  
198 rhizomes. The total length of all rhizomes per plant was measured and all the biomass was  
199 then dried to a constant mass at 60 °C and weighed. The number of rhizomes per plant could  
200 not be counted due to their possible breaking during their extraction from the soil, so we only  
201 have information on their total length. This restricts us from mentioning if the total rhizome  
202 length is due to one rhizome or multiple rhizomes. This does not, however, have any  
203 influence on the results as, in any case, (i.e., the total length is due to one or more rhizomes)  
204 the overall longer length of the rhizome(s) per plant would reflect a greater ability to spread.

205

#### 206 *Plant traits*

207           This study primarily focused on analysing the relationship between rhizome length  
208 (mm) and rhizome mass (g). In addition, we also used other measured traits from the same  
209 individuals (i.e., above-ground biomass (g), number of ramets, total plant biomass (g), net  
210 photosynthetic rate (PN) and specific leaf area (SLA, mm<sup>2</sup>/mg) estimated by Münzbergová et  
211 al., (2017), Stojanova et al., (2018) and Kosová et al., (2021) to test if plant fitness and  
212 performance are linked to changes in the scaling relationships. Since this species reproduces  
213 predominantly clonally and only rarely flowered during the course of the study  
214 (Münzbergová et al., 2017), we used above-ground biomass, number of ramets and total plant  
215 biomass as estimates of plant fitness. Biomass is one of the widely used estimate of plant

216 fitness (Younginger et al., 2017) and number of ramets is considered as good estimate of  
217 fitness in grasses (Pan and Price 2001). We also linked the scaling relationships to net  
218 photosynthetic rate (PN) and specific leaf area (SLA) to understand how changes in rhizome  
219 mass per unit length with increasing length is linked to changes in leaf ability to fix carbon  
220 and leaf construction cost. Due to the high workload required to measure these two traits, the  
221 data on these are only available from 10 genotypes originating from each of the four most  
222 extreme climates of the climatic grid: wettest and driest combined with warmest and coldest,  
223 i.e., 4 original climates  $\times$  4 cultivation climates  $\times$  10 genotypes = 160 measurements in total  
224 (the same as in Kosová et al., 2021).

225

## 226 ***Data analyses***

### 227 *Standardised major axis regression*

228 Standardised major axis (SMA) regression, a method commonly used for analysing  
229 scaling relationships, was used to calculate scaling exponent and elevation ( $\alpha$  and  $\beta$ ,  
230 respectively) for the relationship between rhizome length and mass (Niklas et al., 2007;  
231 Warton et al., 2012). SMA regression is most appropriate when both variables have errors  
232 and there is not a clear distinction between dependent and independent variables (Warton et  
233 al., 2012). A large number of earlier studies had used SMA to explore change in dry mass  
234 investment with increasing leaf area. It has been described using the formulae:  
235  $Area = \beta Mass^\alpha$ , where  $\beta$  is the elevation and  $\alpha$  is the scaling exponent of the log-transformed  
236 area vs. mass regression curve (Niklas et al., 2007). In the case of rhizomes, the formulae will  
237 take the form  $Length = \beta_1 Mass^\alpha$ . Since  $SR_{\tilde{L}} = Length/Mass$  and  $Mass = \beta_2 Length^\alpha$ , it  
238 follows that  $SR_{\tilde{L}} = (1/\beta_2) Length^{1-\alpha}$ . The value of  $\alpha > 1$  in this equation would indicate that  
239 length fails to keep pace with mass (diminishing returns), whereas  $\alpha < 1$  means the opposite  
240 (increasing returns).

241           Using the SMA regression, first, we estimated the scaling exponents and elevation for  
242 each cultivation climate across all populations in order to identify how the general scaling  
243 exponent is modulated by the cultivation climate. Second, we separately estimated the scaling  
244 exponents for plants from each original climate (population) grown at each cultivation  
245 climate to test if trait scaling relationships of plants from different original climates differ  
246 when grown in similar climate. The same analysis will also permit testing if the scaling  
247 exponents for plants from the same climate of origin differ when cultivated in different  
248 climates. In all the cases, we tested if the value of the scaling exponent is significantly  
249 different from 1 using one sample t-test. Using multiple post-hoc comparisons, we tested for  
250 differences in scaling exponents between plants grown in different cultivation climates and  
251 among plants from different original climates grown in different cultivation climates. SMA  
252 was done using ‘sma’ function with the argument ‘multcomp=TRUE’ (for multiple  
253 comparisons) in the ‘SMATR’ package (Warton et al., 2012) of R Version 4.0.3 (R Core  
254 Team and Core R Team, 2019).

255           Using SMA regression we also explored the effect of the direction of climate change  
256 on scaling relationships. For this, we estimated the change in temperature (ChangeT) and the  
257 change in moisture (ChangeM) by subtracting cultivation climate values from the original  
258 climate (expressed as °C for temperature and mm of rainfall, see above). For instance, if the  
259 original temperature is 6.5°C and the cultivation temperature is 12.5°C, the temperature  
260 change is +6°C (for more details see Münzbergová et al., 2017). We then estimated the  
261 scaling exponents based on differences in moisture or temperature between the original and  
262 the cultivation climate. Since scaling exponents differed significantly based on changes in the  
263 moisture, we also tested how change in moisture affects scaling exponents (direction of  
264 effect) using linear regression (‘lm’ function in R).

265   *Mixed-effect models*

266 While SMA regression is the best method to analyse the trait relationships, it does not  
267 allow study of the effects of different factors and their interactions in these relationships.  
268 Further, it does not allow consideration of any additional structure of the data (in our case,  
269 genotypes). We thus also analysed the data using mixed-effects regression models (see  
270 Husáková et al., 2018 for a similar approach). In the model, we used length as a dependent  
271 variable and mass as an explanatory variable, with original climate (temperature and  
272 precipitation, referred to as Otemp and Omois respectively), cultivation climate (referred to  
273 as Ttemp and Tmois) and interactions as fixed factors, and genotype as a random factor.  
274 Since the model was complex (with up to five interacting factors) we used the Akaike  
275 Information Criterion (AIC) to select the best model (Säfken et al., 2018).

276 We also used the mixed effects regression to explore the effect of the direction of  
277 climate change on trait relationships, providing a more straightforward interpretation of the  
278 possible interactions between the climate of origin and that of cultivation. For this, we used  
279 ChangeT and ChangeM as fixed factors in the model and also tested their interactions with  
280 mass. As above, genotype was used as a random factor. Mixed-effects regression was carried  
281 out using ‘lmer’ function in ‘lme4’ package (Bates et al., 2015) of R Version 4.0.3 (R Core  
282 Team and Core R Team 2019). Rhizome length and mass values were log-transformed before  
283 model fitting.

#### 284 *Relationships with fitness*

285 To get an overview of the effect of the scaling exponent on plant fitness and resource  
286 capture traits, we used structural equation modelling (SEM) using the ‘sem’ function of the  
287 ‘lavaan’ package (Rosseel, 2012) of R. Data points in SEM were values of the scaling  
288 exponent, one for each population and cultivation conditions, and average trait values based  
289 on the same plants; one also for each population and cultivation conditions. In the SEM, we  
290 only used the variables that were significantly related to the scaling exponent. The

291 relationship was tested using linear regression ('lm' function in R), (for details see  
292 supplementary information S1). We considered three possible measures of plant fitness in the  
293 SEM, the number of ramets and above-ground biomass and the total biomass. As the scaling  
294 exponent was not related to the number of ramets and above-ground biomass, only total  
295 biomass was used in the SEM presented. While doing the SEM, the best model was selected  
296 based on the lowest AIC value of the model and highest p value of Chi-Square ( $\chi^2$ )  
297 (Schermelleh-Engel et al., 2003; Barrett, 2007). The other measures of goodness of model fit  
298 (comparative fit index, Tucker Lewis index, root mean square error of approximation, and the  
299 standardised root mean square residual) as recommended by Coughlan et al., (2008) were  
300 also used to determine the model fit.

301 In SEM, we used the scaling exponent as the explanatory variable for response  
302 variables (rhizome length, SLA, and total biomass). We also used SLA as explanatory  
303 variable for PN and rhizome length. PN was also used as an explanatory variable for rhizome  
304 length. SLA and rhizome length were also used as explanatory variables for total biomass  
305 (indicator of fitness). Additionally, we also ran the model by using biomass excluding  
306 rhizomes and total biomass as indicators of fitness; the results were largely similar (not  
307 shown).

308

## 309 **RESULTS**

### 310 *Effects of the cultivation climate on the scaling relationships*

311 The mixed-effects regression results revealed that the relationship between rhizome length  
312 and mass was affected by both the moisture and the temperature of the cultivation climate  
313 (i.e., driven by phenotypic plasticity); the effect of moisture was, however, stronger (Table  
314 1). The effects of temperature and moisture did not, however, interact (Table 1).

315 From the SMA regression, we found that plants cultivated in different cultivation  
316 climates differed significantly in the numerical values of  $\alpha$ , see Table 2. The value of the  
317 scaling exponent ( $\alpha$ ) was significantly greater than 1 in all four cultivation climates (Table 2  
318 and Figure 2). This indicates that rhizome dry mass increases disproportionately faster than  
319 rhizome length. In other words, rhizome construction costs increase with increasing length.  
320 As a consequence, longer rhizomes tend to have lower  $SR_zL$ . The value of the scaling  
321 exponent ( $\alpha$ ) was significantly larger in plants cultivated in wet climates (both warm wet and  
322 cold wet) than in dry climates (Table 2 and Figure 2). This indicates that larger rhizomes are  
323 even more costly (in terms of biomass investment per unit length) in wet than in dry  
324 cultivation climates.

325 Despite significant differences in the scaling exponents among the four cultivation  
326 climates, the value of the scaling exponents was always significantly greater than 1 (Figure  
327 2). This means that across various cultivation climates, the increases in rhizome mass result  
328 in disproportionately less gains in rhizome length (because  $\alpha > 1$ ), but the gain is even lower  
329 in wet climates. When the value of the scaling exponents from each climate of origin in each  
330 cultivation climate were tested against the value of 1, it was found that the value of the  
331 scaling exponent was either equal to 1 or greater than 1 but was never less than 1. This  
332 indicated that there could be a proportionate increase in rhizome length and mass or there is a  
333 disproportionately higher increase in mass than length, but length can never increase  
334 proportionately greater than mass.

335

### 336 *Effects of the climate of origin on the scaling relationships*

337 In the linear mixed-effects regression analysis, there were no significant interactions  
338 of mass with original climate only (Table 1). The only significant effects of the original  
339 climate were in interactions with the cultivation climate (i.e., Mass:Tmois:Otemp,

340 Mass:Ttemp:Otemp, Mass:Tmois:Ttemp:Otemp in Table 1) indicating that plasticity in the  
341 relationships between rhizome length and rhizome mass depends upon the climate of origin.  
342 Additionally, in the SMA results, there were significant differences among plants from  
343 different original climates within a cultivation climate (evident only in T3\_M1 cultivation  
344 climate -(see Table 3 and Figure 3) as well as between cultivation climates (e.g., T1\_M1 and  
345 T3\_M4 in Table 3). Scaling exponents also differed in plants from the same climate of origin  
346 when they were grown in different cultivation climates (e.g., in T2\_M1 and T2\_M4). The  
347 value of the scaling exponent for each original climate across all the cultivation climates  
348 ranged from 0.903 (statistically not different from 1; e.g., climate of origin T2\_M4 grown in  
349 warm and dry climate, T3\_M1) to 1.395 (significantly greater than 1 (e.g., genotypes from  
350 climate T3\_M4 grown in cold and wet climate, T1\_M4).

351

### 352 *Effects of climate change on scaling relationships*

353 In the mixed-effects regression analysis based on degree of change in temperature and  
354 moisture between the climate of origin and the cultivation climate, significant interaction  
355 between 'Mass' and 'ChangeM' (change in moisture) was found (Table 4). This indicated  
356 differing scaling exponents based on changes in moisture. The SMA regression also revealed  
357 similar results and the value of the scaling exponent significantly increased with an increase  
358 in moisture (Figure 4). Change in temperature had no effect on the scaling exponent. This  
359 indicates that increasing or decreasing temperatures does not cause any additional change in  
360 rhizome construction cost with increasing length, but, with an increase in moisture, the  
361 rhizome mass (construction cost) increases disproportionately more than the rhizome length  
362 at an increased rate.

363

### 364 *Relationship between scaling relationships and plant fitness*

365           The high  $p$  value of the  $\chi^2$  (0.99) as well as other estimated measures (e.g., Tucker  
366 Lewis index, root mean square error of approximation etc.) indicated a good fit of the  
367 structural equation model (supplementary Table S2.5). The model was able to moderately  
368 explain the variances in each of the response variables ( $R^2$  ranged from 0.34 to 0.68) (Figure  
369 5). The model revealed that the increasing value of the scaling exponent significantly  
370 negatively influenced rhizome length and SLA, indicating that both rhizome length and SLA  
371 increases with decreasing value of the scaling exponent. The increasing SLA further led to an  
372 enhanced photosynthetic rate (PN) thereby increasing the total carbon fixed by the plant, but  
373 the PN was not significantly related to total biomass. When SLA were higher, total biomass  
374 also tends to be higher and was evident in the model from a marginally-significant, positive  
375 relationship ( $p=0.054$ ) between the two. However, increasing SLA also led to decreasing  
376 rhizome length. Additionally, longer rhizomes were also significantly positively linked with  
377 higher plant total biomass.

## 378 **DISCUSSION**

379           Trait scaling relationships have important implications for understanding the plant  
380 resource use strategies and the ability of plants to acclimatise or adapt to variable  
381 environmental conditions. In this study, we analysed the rhizome length versus mass scaling  
382 relationships and found a considerable variation in the scaling exponents. The main findings  
383 emanating from this study are: (i) The rhizome length fails to keep pace with increasing mass  
384 and, as a result, with increasing rhizome length the rhizome construction costs increase. (ii)  
385 Trait scaling relationships are modulated by climatic conditions in which the plants grow, and  
386 their effect interacts with the climate of origin. (iii) Climate change affects the scaling  
387 relationships and wetter climates lead to greater increase in rhizome construction costs with  
388 increasing length. (iv) Trait scaling relationships are closely linked to plant performance (e.g.,  
389 carbon capture capacity by leaves).



390

391 ***Rhizome construction cost increases with increasing length***

392 Our analyses show that scaling relationships for the functional traits that primarily  
393 influence plant vegetative spread have a scaling exponent greater than one in all the  
394 cultivation climates. Thus, changes in rhizome length fail to keep pace with increasing mass.  
395 This indicates that either bulk rhizome-tissue density or thickness (or both) increase as  
396 rhizome length increases (causing decreased  $SR_{zL}$ ). The result is similar to those reported for  
397 above-ground plant traits (e.g., leaf size and leaf mass, Leishman et al., 2007; Price and  
398 Enquist, 2007; Atkin et al., 2008)). Theoretically, these results mean diminishing returns  
399 from an increase in rhizome length (i.e., increasing construction cost for larger rhizomes).  
400 This finding is in parallel with Niklas et al., (2007) and (Milla and Reich 2007) who reported  
401 ‘diminishing returns’ in the case of leaves.

402 The finding follows the metabolic scaling theory (Enquist et al., 2007) supporting the  
403 fact that trait relationships are similar across evolutionary-distinct organisms as well as in  
404 ecologically distinct functional traits. We assume that this increasing cost could be because  
405 rhizomes are also the organs to transport water and minerals to above-ground parts, additional  
406 mechanical support is, therefore, required for longer distance transport. Additionally,  
407 rhizomes are also storage organs in grasses (for soluble as well as for non-soluble  
408 carbohydrates (Klimeš et al., 1999; Kinmonth-Schultz and Kim, 2011), but this feature is  
409 unlikely to cause higher mass per unit length with increasing length. Although such  
410 information is missing in the literature, we also do not have any reason to expect that storage  
411 function of rhizomes would affect scaling between the rhizome mass and the length (i.e.,  
412 larger rhizomes should store disproportionately more or less carbohydrates per unit length  
413 than smaller ones). Nevertheless, testing if rhizome length and stored carbohydrates have  
414 isometric relationship is an open question.

415 Further, the study species is commonly grazed in natural habitats, so longer rhizomes  
416 are more vulnerable to herbivore damage via trampling. Therefore, greater investment in  
417 mechanical tissues (more xylem or thick-walled cells) may also be helpful in this case. In this  
418 context, Striker et al., (2006) stated that the porosity of roots in a grass species (*Paspalum*  
419 *dilatatum*) is lower (density is higher) when exposed to trampling. Although there is  
420 additional cost associated with longer rhizomes, longer rhizomes enable positioning of new  
421 ramets away from the parents thereby decreasing intra-clone competition and increasing  
422 resource availability and the higher investment is thus reasonable. This might be an important  
423 strategy of clonal plants and may lead to overall positive returns (e.g., higher dominance in a  
424 community).

425

#### 426 ***Scaling relationships are modulated by growth conditions***

427 Rhizome length vs mass scaling relationships varied among plants cultivated under  
428 different climatic conditions demonstrating that scaling relationships are modulated in  
429 response to growth conditions. While there are no previous studies on rhizome scaling  
430 relationships allowing comparison with our results, several previous studies showed the effect  
431 of climate on scaling relationships of leaf traits (e.g., Wright et al., 2005; Atkin et al., 2008;  
432 Xiang et al., 2013; Thakur et al., 2019). All these studies were, however, from natural  
433 environments and were not able to separate phenotypic plasticity from genetic differentiation.  
434 By using data from experimentally-manipulated conditions, we were able to separate multiple  
435 effects in this study. Our results provide strong evidence that plant scaling relationships are  
436 plastic. This finding is important because evidence of the plasticity in scaling exponents is  
437 lacking, particularly in plants (for animals, see Casasa & Moczek, 2019)). Specifically, these  
438 findings indicate the importance of modulation in scaling relationships under variable  
439 climates in *Festuca rubra*. We argue that similar to the role of trait plasticity in plant

440 persistence under variable climates, plasticity in scaling relationships is also important and  
441 might be helpful in optimal resource allocation under changing climatic conditions to  
442 enhance plant fitness.

443         The variation in scaling relationships with changing cultivation conditions might help  
444 the plant to balance the need for efficient vegetative spread, resource use and protection  
445 against desiccation and soil herbivores. The direction of the shift in the scaling exponent  
446 (lower value in drier sites) was, however, unexpected. The majority of the previous literature  
447 indicates that warmer and wetter conditions favour plant growth (Natali et al., 2012;  
448 Buermann et al., 2018) but our data indicate the opposite (because higher tissue construction  
449 costs have negative consequences). This could be because the wet climate was too wet  
450 (simulation of 2700 mm of annual rainfall) and thus not favourable for the species as also  
451 claimed by Münzbergová et al., (2017). These too wet conditions may create hypoxic  
452 conditions; it is known that plants in hypoxic conditions have thick, aerenchymatic below-  
453 ground structures (Pedersen et al., 2021). To increase thickness there would be additional  
454 allocation of resources in the aerenchyma (which otherwise is not needed) and when  
455 rhizomes are longer, more thicker tissues can be helpful for longer-distance, oxygen  
456 transport. Therefore, more carbon allocation is needed with increasing rhizome length.  
457 Secondly, a transition towards a 'phalanx' resource use strategy (higher number of ramets per  
458 unit length) was also evident in this species in wet climates (Supplementary Figure S2.1) and  
459 this transition could be responsible for the higher rate of increase in rhizome construction cost  
460 with increasing length. This can be expected because plants with 'phalanx' strategy have  
461 shorter internodes, which are linked to increased stem density, and decreased hydraulic  
462 conductivity (Jacobsen et al., 2020). The decrease in hydraulic conductivity with increasing  
463 number of nodes is because some of the vessels end in each internode thus disrupting the  
464 resource flow (Jacobsen et al., 2020). Therefore, with increasing rhizome length, the need to

465 maintain hydraulic conductivity of plants in wet conditions having many internodes may  
466 impose additional costs. Third, with increasing wetness, there might be increased activity of  
467 soil herbivores or parasitic fungi (Velásquez et al., 2018). Hence, additional investments per  
468 unit length are needed for protection because tissues with lower carbon content are easier to  
469 degrade (Silver and Miya, 2001). Overall, our results indicate that it is more economical for  
470 this clonal species to form longer rhizomes in conditions with lower water availability. This  
471 was evident in the results as plants in drier conditions had longer rhizomes (Supplementary  
472 Figure S2.2).

473         The differences in the value of scaling exponents among cultivation climates were  
474 apparently very small but, as shown by Milla & Reich (2007), the small differences in the  
475 numerical value of the scaling exponent (among cultivation climates in our case) can translate  
476 into very large differences in construction cost per unit length when rhizomes differ greatly in  
477 length. These small differences can have huge consequences for the overall plant  
478 performance (e.g., vegetative spread) because of greater cost to build and maintain a unit of  
479 rhizome length, which should constrain the maximum rhizome length achieved by a plant.  
480 Milla and Reich (2007) demonstrated that 1.07 value of the scaling exponent in leaf area vs  
481 mass relationship cause 22% increase in per unit leaf construction cost, when leaf size  
482 increased by about 6.5-fold (i.e., 96 to 622 cm<sup>2</sup>). Considering this example, one can imagine  
483 the impact of only a small deviation of the scaling exponent from 1.

484         Interestingly, in this study, the total length of the rhizome in climates with a greater  
485 increase in construction cost (e.g., warm and wet) remained far less than in climates with a  
486 lesser increase in construction cost (see Supplementary Figure S2.2). We argue that there  
487 might be economic constraints that limit rhizome elongation (or ability to spread) when  
488 construction cost is increasing rapidly. This shorter length of the rhizome in warm and wet  
489 climates may, therefore, be the negative consequence of greater increase in construction cost.

490 Our result also hints that plants tend to keep the rhizome construction cost under a certain  
491 threshold, above which rhizomes are not formed. This was supported by the fact that  $SR_2L$   
492 was not significantly lower in warm and wet cultivation climate than dry and wet climate, but  
493 rhizome length was kept short. Moreover, despite shorter rhizomes, the  $SR_2L$  at the  
494 cultivation climates with higher construction costs have higher variance (inferred based on  
495 trait driver theory (Enquist et al., 2015), (Supplementary Figure S2.3). This indicated that in  
496 such climates, plants are beginning to construct rhizomes with a lower construction cost but,  
497 as a consequence of a larger value of the scaling exponent, construction cost surpassed to that  
498 in drier climates at much shorter lengths.

499

#### 500 ***Genetic differentiation in the scaling relationship***

501 We suspected that scaling relationships might also be result of adaptation to  
502 environments at the places of origin. While we did not find any significant interaction  
503 between mass and the climate of origin, we detected triple interactions between mass, the  
504 climate of origin and that of cultivation indicating genetic differentiation in the plasticity of  
505 the scaling relationships. This finding provided supporting evidence to possible local  
506 adaptation in scaling relationships associated with phenotypic optimisation to enhance  
507 fitness. This is in line with Vasseur et al., (2018) providing evidence for a genetic basis in the  
508 scaling relationship of plant dry mass vs growth rate in *Arabidopsis thaliana*.

509 In combination with the effect of climate change on the scaling relationships, our  
510 results support the idea that scaling relationships are modulated significantly by original as  
511 well as cultivation climate at intraspecific levels. Therefore, we suspect that, at community  
512 level, differences in scaling relationships (reported in many earlier studies on leaf traits  
513 (Niklas and Enquist, 2001; Milla and Reich, 2007; Niklas et al., 2007; Thakur et al., 2019))

514 could be result of both intraspecific (i.e., responses to climate and local adaptation) as well as  
515 interspecific effects (i.e., due to species turnover).

516

### 517 *Scaling relationships are linked to plant fitness*

518 The inverse relationship of the scaling exponent with the total plant biomass indicated  
519 that plant fitness decreases when formation of longer rhizomes becomes more costly (i.e., a  
520 larger value of the scaling exponent). This was also expected because higher investment per  
521 unit length can have negative consequences (less investment) for other traits involved in  
522 resource acquisition. The SEM result supports that decreased scaling exponent was associated  
523 with lower leaf construction cost (i.e. SLA). In turn, this lower leaf construction cost was  
524 associated with higher photosynthetic efficiency. Therefore, when leaf construction costs are  
525 lower, more light can be intercepted by the same aboveground mass (Milla and Reich 2007)  
526 and, subsequently, more carbon is fixed. Overall, performance of leaves was greatly  
527 increased when the scaling exponent was lower.

528 Our results also indicated that when the value of scaling exponent is lower, longer  
529 rhizomes are formed indicating the plant's ability to vegetatively spread is also enhanced.  
530 Additionally, the net returns as represented by total biomass were also dependent on rhizome  
531 length (the greater the length, the higher the returns), (see also supplementary Figure S1.1).  
532 The negative relationship between the SLA and rhizome length in the SEM indicates that the  
533 'exploitative' resource use strategy of leaves is linked to the limited ability of plants to spread  
534 vegetatively. The probable reason is that when leaves are more productive, more resources  
535 are allocated to roots to exploit more nutrients from the soil. This was supported by a strong  
536 positive relationship between SLA and root biomass (Supplementary figure S2.4).

537 Our results on the relationship of the scaling exponent with leaf traits (PN and SLA)  
538 also indicate that changes in below-ground tissue construction costs are linked to above-

539 ground tissue construction costs. We could have tested this hypothesis in this study, but the  
540 available data of leaf area and leaf mass did not allow us to do so (as the SLA was based on  
541 data from leaf fragments). Overall, the findings of this study provided evidence that when  
542 scaling relationships are modulated, plant fitness is compromised. The scaling exponents  
543 indicating ‘diminishing returns’ (as defined in Niklas et al., 2007) had negative consequences  
544 on plant fitness. As we have very scarce information about plant investments into rhizomes  
545 (in comparison with other plant organs) and how these investments are modulated by growth  
546 conditions, more such studies are awaited to know if the patterns are similar across clonal  
547 species with different phylogenetic histories. While many current studies are dealing with the  
548 benefits of clonal growth, more studies (such as this one) are needed to shed light on clonal  
549 growth costs. It can be expected that as with above-ground plant organs, the patterns  
550 observed in this study may also stand true for other species that reproduce mainly clonally.  
551 Nevertheless, this needs to be tested in diverse species occurring in different ecoregions.

552

### 553 *Conclusions*

554 Our analysis of the scaling of rhizome length vs mass indicates that rhizome length  
555 fails to scale one to one with rhizome mass due to which longer rhizomes have higher  
556 construction costs (i.e., lower  $SR_2L$ ). Our findings provided evidence for plasticity in scaling  
557 relationships in plant traits and demonstrated that the rate of increase in rhizome construction  
558 costs with length depends upon the growth conditions. Among the climatic conditions, the  
559 moisture of the cultivation conditions was the main determinant of the scaling relationships.  
560 Our results also provided additional support for genetic basis in the scaling relationship.  
561 Finally, we have demonstrated that scaling relationships are closely linked to plant  
562 performance and lower scaling exponents (with length, a lower increase in construction cost)  
563 are linked to traits representing acquisitive resource use strategy.

564

565 **CONFLICT OF INTEREST**

566 The authors declare no conflict of interest

567

568 **REFERENCES**

569 **Anderson JT. 2016.** Plant fitness in a rapidly changing world. *New Phytologist* **210**: 81–87.

570 **Atkin OK, Atkinson LJ, Fisher RA, et al. 2008.** Using temperature-dependent changes in  
571 leaf scaling relationships to quantitatively account for thermal acclimation of respiration in a  
572 coupled global climate-vegetation model. *Global Change Biology* **14**: 2709–2726.

573 **Balestri E, Lardicci C. 2014.** Seagrass response to burial and breakage of expanding  
574 horizontal rhizomes: Implications for clone spread. *Marine Ecology Progress Series* **504**:  
575 133–145.

576 **Barrett P. 2007.** Structural equation modelling: Adjudging model fit. *Personality and*  
577 *Individual Differences* **42**: 815–824.

578 **Bates D, Mächler M, Bolker B, Walker S. 2015.** Fitting Linear Mixed-Effects Models  
579 Using lme4. *Journal of Statistical Software* **67**.

580 **Billings WD, Mooney HA. 1968.** The Ecology of Arctic and Alpine Plants. *Biological*  
581 *Reviews* **43**: 481–529.

582 **Buermann W, Forkel M, O’Sullivan M, et al. 2018.** Widespread seasonal compensation  
583 effects of spring warming on northern plant productivity. *Nature* **562**: 110–114.

584 **Casasa S, Moczek AP. 2019.** Evolution of, and via, Developmental Plasticity: Insights  
585 through the Study of Scaling Relationships. *Integrative and Comparative Biology* **59**: 1346–  
586 1355.

587 **Chen G, Hobbie SE, Reich PB, Yang Y, Robinson D. 2019.** Allometry of fine roots in



- 588 forest ecosystems (P Thrall, Ed.). *Ecology Letters* **22**: 322–331.
- 589 **Coughlan J, Coughlan J, Mullen M. 2008.** Structural Equation Modeling□: Guidelines for  
590 Determining Model Fit. *Electronic Journal of Business Research Methods* **6**: 53–60.
- 591 **Datta A, Kühn I, Ahmad M, Michalski S, Auge H. 2017.** Processes affecting altitudinal  
592 distribution of invasive *Ageratina adenophora* in western Himalaya: The role of local  
593 adaptation and the importance of different life-cycle stages (S Delzon, Ed.). *PLOS ONE* **12**:  
594 e0187708.
- 595 **Deng Q, Yuan Z, Shi X, Lock TR, Kallenbach RL. 2020.** Testing allometric scaling  
596 relationships in plant roots. *Forest Ecosystems* **7**: 1–11.
- 597 **De Deyn GB, Cornelissen JHC, Bardgett RD. 2008.** Plant functional traits and soil carbon  
598 sequestration in contrasting biomes. *Ecology Letters* **11**: 516–531.
- 599 **Díaz S, Kattge J, Cornelissen JHC, et al. 2016.** The global spectrum of plant form and  
600 function. *Nature* **529**: 167–171.
- 601 **Duchoslavová J, Jansa J. 2018.** The direction of carbon and nitrogen fluxes between ramets  
602 in *Agrostis stolonifera* changes during ontogeny under simulated competition for light.  
603 *Journal of Experimental Botany* **69**: 2149–2158.
- 604 **Enquist BJ, Norberg J, Bonser SP, et al. 2015.** Scaling from Traits to Ecosystems:  
605 Developing a General Trait Driver Theory via Integrating Trait-Based and Metabolic Scaling  
606 Theories. *Advances in Ecological Research* **52**: 249–318.
- 607 **Enquist BJ, Tiffney BH, Niklas KJ. 2007.** Metabolic scaling and the evolutionary dynamics  
608 of plant size, form, and diversity: Toward a synthesis of ecology, evolution, and  
609 paleontology. *International Journal of Plant Sciences* **168**: 729–749.
- 610 **Fajardo A. 2016.** Are trait-scaling relationships invariant across contrasting elevations in the  
611 widely distributed treeline species *Nothofagus pumilio*? *American Journal of Botany* **103**:  
612 821–829.

- 613 **GBIF.org. 2021.** *Festuca rubra L.* in *GBIF Secretariat (2019). GBIF Backbone Taxonomy.*  
614 *Checklist dataset* <https://doi.org/10.15468/39omei> accessed via *GBIF.org* on 2021-03-07.
- 615 **Goldberg DE, Batzer E, Elgersma K, Martina J, Klimešová J. 2020.** Allocation to clonal  
616 growth: Critical questions and protocols to answer them. *Perspectives in Plant Ecology,*  
617 *Evolution and Systematics* **43**: 125511.
- 618 **Halbritter AH, Fior S, Keller I, et al. 2018.** Trait differentiation and adaptation of plants  
619 along elevation gradients. *Journal of Evolutionary Biology* **31**: 784–800.
- 620 **Hull JC. 2008.** Encyclopedia of Ecology. *Encyclopedia of Ecology*: 2818–2824.
- 621 **Hurlbert SH. 1984.** Pseudoreplication and the Design of Ecological Field Experiments.  
622 *Ecological Monographs* **54**: 187–211.
- 623 **Hurlbert SH. 2004.** On misinterpretations of pseudoreplication and related matters: A reply  
624 to Oksanen In: *Oikos*. John Wiley & Sons, Ltd, 591–597.
- 625 **Husáková I, Weiner J, Münzbergová Z. 2018.** Species traits and shoot-root biomass  
626 allocation in 20 dry-grassland species. *Journal of Plant Ecology* **11**: 273–285.
- 627 **Jacobsen AL, Fickle JC, Castro V, Madsen A, Ennajeh M, Pratt RB. 2020.** Node  
628 frequency alters stem biomechanics and hydraulics in four deciduous woody species. *Journal*  
629 *of Wood Science* **66**: 26.
- 630 **Johnson SN, Gherlenda AN, Frew A, Ryalls JMW. 2016.** The importance of testing  
631 multiple environmental factors in legume–insect research: Replication, reviewers, and  
632 rebuttal. *Frontiers in Plant Science* **7**: 489.
- 633 **Kinmonth-Schultz H, Kim SH. 2011.** Carbon gain, allocation and storage in rhizomes in  
634 response to elevated atmospheric carbon dioxide and nutrient supply in a perennial C<sub>3</sub> grass,  
635 *Phalaris arundinacea*. *Functional Plant Biology* **38**: 797–807.
- 636 **Klanderud K, Vandvik V, Goldberg D. 2015.** The Importance of Biotic vs. Abiotic Drivers  
637 of Local Plant Community Composition Along Regional Bioclimatic Gradients (C Armas,

- 638 Ed.). *PLOS ONE* **10**: e0130205.
- 639 **Klimesš L, Klimesšová J, Čížková H. 1999.** Carbohydrate storage in rhizomes of *Phragmites*  
640 *australis*: The effects of altitude and rhizome age. *Aquatic Botany* **64**: 105–110.
- 641 **Klimesšová J, De Bello F. 2009.** CLO-PLA: the database of clonal and bud bank traits of  
642 Central European flora. *Journal of Vegetation Science* **20**: 511–516.
- 643 **Klimesšová J, Janeček Š, Bartušková A, et al. 2017.** Is the scaling relationship between  
644 carbohydrate storage and leaf biomass in meadow plants affected by the disturbance regime?  
645 *Annals of Botany* **120**: 979–985.
- 646 **Körner C. 2003.** *Alpine Plant Life: Functional Plant Ecology of High Mountain Ecosystems*.  
647 Berlin, Heidelberg: Springer Berlin Heidelberg.
- 648 **Kosová V, Hájek T, Hadincová V, Munzbergova Z. 2021.** Ecophysiological traits of a  
649 clonal grass in its climate change response. *Physiologia Plantarum*: In Press.
- 650 **Kramer-Walter KR, Bellingham PJ, Millar TR, Smissen RD, Richardson SJ, Laughlin**  
651 **DC. 2016.** Root traits are multidimensional: specific root length is independent from root  
652 tissue density and the plant economic spectrum. *Journal of Ecology* **104**: 1299–1310.
- 653 **Leishman MR, Haslehurst T, Ares A, Baruch Z. 2007.** Leaf trait relationships of native  
654 and invasive plants: Community- and global-scale comparisons. *New Phytologist* **176**: 635–  
655 643.
- 656 **Liu Y, Dawson W, Prati D, Haeuser E, Feng Y, Van Kleunen M. 2016.** Does greater  
657 specific leaf area plasticity help plants to maintain a high performance when shaded? *Annals*  
658 *of Botany* **118**: 1329–1336.
- 659 **Lopez F, Acosta FJ, Serrano JM. 1994.** Guerilla vs. Phalanx Strategies of Resource  
660 Capture: Growth and Structural Plasticity in the Trunk Trail System of the Harvester Ant  
661 *Messor barbarus*. *The Journal of Animal Ecology* **63**: 127.
- 662 **Manzanedo RD, Fischer M, María Navarro Cerrillo R, Allan E. 2019.** A new approach

663 to study local adaptation in long-lived woody species: Virtual transplant experiments (S  
664 Ramula, Ed.). *Methods in Ecology and Evolution* **10**: 1761–1772.

665 **Meyer AH, Schmid B. 1999.** Experimental demography of rhizome populations of  
666 establishing clones of *Solidago altissima*. *Journal of Ecology* **87**: 42–54.

667 **Milla R, Reich PB. 2007.** The scaling of leaf area and mass: The cost of light interception  
668 increases with leaf size. *Proceedings of the Royal Society B: Biological Sciences* **274**: 2109–  
669 2114.

670 **Mota CF, Engelen AH, Serrao EA, et al. 2018.** Differentiation in fitness-related traits in  
671 response to elevated temperatures between leading and trailing edge populations of marine  
672 macrophytes (G Diaz-Pulido, Ed.). *PLOS ONE* **13**: e0203666.

673 **Münzbergová Z, Hadincová V, Skálová H, Vandvik V. 2017.** Genetic differentiation and  
674 plasticity interact along temperature and precipitation gradients to determine plant  
675 performance under climate change. *Journal of Ecology* **105**: 1358–1373.

676 **Münzbergová Z, Latzel V, Šurinová M, Hadincová V. 2019.** DNA methylation as a  
677 possible mechanism affecting ability of natural populations to adapt to changing climate.  
678 *Oikos* **128**: 124–134.

679 **Natali SM, Schuur EAG, Rubin RL. 2012.** Increased plant productivity in Alaskan tundra  
680 as a result of experimental warming of soil and permafrost. *Journal of Ecology* **100**: 488–498.

681 **Niklas KJ, Cobb ED, Niinemets Ü, et al. 2007.** “Diminishing returns” in the scaling of  
682 functional leaf traits across and within species groups. *Proceedings of the National Academy  
683 of Sciences of the United States of America* **104**: 8891–8896.

684 **Niklas KJ, Enquist BJ. 2001.** Invariant scaling relationships for interspecific plant biomass  
685 production rates and body size. *Proceedings of the National Academy of Sciences* **98**: 2922–  
686 2927.

687 **Oksanen L. 2001.** Logic of experiments in ecology: Is pseudoreplication a pseudoissue? In:

- 688 *Oikos*. Blackwell Munksgaard, 27–38.
- 689 **Ott JP, Klimešová J, Hartnett DC. 2019.** The ecology and significance of below-ground  
690 bud banks in plants. *Annals of Botany* **123**: 1099–1118.
- 691 **Pan JJ, Price JS. 2001.** Fitness and evolution in clonal plants: The impact of clonal growth.  
692 *Evolutionary Ecology* **15**: 583–600.
- 693 **Pedersen O, Sauter M, Colmer TD, Nakazono M. 2021.** Regulation of root adaptive  
694 anatomical and morphological traits during low soil oxygen. *New Phytologist* **229**: 42–49.
- 695 **Poorter H, Jagodzinski AM, Ruiz-Peinado R, et al. 2015.** How does biomass distribution  
696 change with size and differ among species? An analysis for 1200 plant species from five  
697 continents. *New Phytologist* **208**: 736–749.
- 698 **Price CA, Enquist BJ. 2007.** Scaling mass and morphology in leaves: An extension of the  
699 wbe model. *Ecology* **88**: 1132–1141.
- 700 **R Core Team, Core R Team. 2019.** R: A language and environment for statistical  
701 computing. *R Foundation for Statistical Computing, Vienna, Austria* **2**: [https://www.R--](https://www.R-project.org)  
702 [project.org](https://www.R-project.org).
- 703 **Reich PB. 2014.** The world-wide “fast-slow” plant economics spectrum: A traits manifesto.  
704 *Journal of Ecology* **102**: 275–301.
- 705 **Reich PB, Walters MB, Ellsworth DS. 1997.** From tropics to tundra: Global convergence in  
706 plant functioning. *Proceedings of the National Academy of Sciences* **94**: 13730–13734.
- 707 **Rosseel Y. 2012.** lavaan□: An R Package for Structural Equation Modeling. *Journal of*  
708 *Statistical Software* **48**.
- 709 **Säfken B, Rügamer D, Kneib T, Greven S. 2018.** *Conditional model selection in mixed-*  
710 *effects models with cAIC4*.
- 711 **Schermelleh-Engel K, Moosbrugger H, Müller H. 2003.** Evaluating the fit of structural  
712 equation models: Tests of significance and descriptive goodness-of-fit measures. *MPR-online*

- 713 **8**: 23–74.
- 714 **Silver WL, Miya RK. 2001.** Global patterns in root decomposition: Comparisons of climate  
715 and litter quality effects. *Oecologia* **129**: 407–419.
- 716 **Skálová H, Pecháčková S, Suzuki J, et al. 1997.** Within population genetic differentiation  
717 in traits affecting clonal growth: *Festuca rubra* in a mountain grassland. *Journal of*  
718 *Evolutionary Biology* **10**: 383–406.
- 719 **Speed JDM, Cooper EJ, Jónsdóttir IS, Van Der Wal R, Woodin SJ. 2010.** Plant  
720 community properties predict vegetation resilience to herbivore disturbance in the Arctic.  
721 *Journal of Ecology* **98**: 1002–1013.
- 722 **Springate DA, Kover PX. 2014.** Plant responses to elevated temperatures: a field study on  
723 phenological sensitivity and fitness responses to simulated climate warming. *Global Change*  
724 *Biology* **20**: 456–465.
- 725 **Stojanova B, Šurinová M, Klápště J, Kolářiková V, Hadincová V, Münzbergová Z.**  
726 **2018.** Adaptive differentiation of *Festuca rubra* along a climate gradient revealed by  
727 molecular markers and quantitative traits. *PLoS ONE* **13**: 1–20.
- 728 **Šurinová M, Hadincová V, Vandvik V, Münzbergová Z. 2019.** Temperature and  
729 precipitation, but not geographic distance, explain genetic relatedness among populations in  
730 the perennial grass *Festuca rubra*. *Journal of Plant Ecology* **12**: 730–741.
- 731 **Thakur D, Rathore N, Chawla A. 2019.** Increase in light interception cost and metabolic  
732 mass component of leaves are coupled for efficient resource use in the high altitude  
733 vegetation. *Oikos* **128**: 254–263.
- 734 **Vasseur F, Exposito-Alonso M, Ayala-Garay OJ, et al. 2018.** Adaptive diversification of  
735 growth allometry in the plant *Arabidopsis thaliana*. *Proceedings of the National Academy of*  
736 *Sciences of the United States of America* **115**: 3416–3421.
- 737 **Velásquez AC, Castroverde CDM, He SY. 2018.** Plant–Pathogen Warfare under Changing

- 738 Climate Conditions. *Current Biology* **28**: R619–R634.
- 739 **Warton DI, Duursma RA, Falster DS, Taskinen S. 2012.** *smatr 3- an R package for*  
740 *estimation and inference about allometric lines.*  
741 <https://besjournals.onlinelibrary.wiley.com/doi/epdf/10.1111/j.2041-210X.2011.00153.x>. 25  
742 Jan. 2021.
- 743 **Weihner E, Clarke GDP, Keddy PA. 1998.** Community Assembly Rules, Morphological  
744 Dispersion, and the Coexistence of Plant Species. *Oikos* **81**: 309–322.
- 745 **Wild J, Kopecký M, Macek M, Šanda M, Jankovec J, Haase T. 2019.** Climate at  
746 ecologically relevant scales: A new temperature and soil moisture logger for long-term  
747 microclimate measurement. *Agricultural and Forest Meteorology* **268**: 40–47.
- 748 **Wright IJ, Reich PB, Cornelissen JHC, et al. 2005.** Modulation of leaf economic traits and  
749 trait relationships by climate. *Global Ecology and Biogeography* **14**: 411–421.
- 750 **Wright IJ, Reich PB, Westoby M, et al. 2004.** The worldwide leaf economics spectrum.  
751 *Nature* **428**: 821–827.
- 752 **Xiang S, Reich PB, Sun S, Atkin OK. 2013.** Contrasting leaf trait scaling relationships in  
753 tropical and temperate wet forest species. *Functional Ecology* **27**: 522–534.
- 754 **Yan ER, Wang XH, Chang SX, He F. 2013.** Scaling relationships among twig size, leaf  
755 size and leafing intensity in a successional series of subtropical forests. *Tree Physiology* **33**:  
756 609–617.
- 757 **Ye XH, Yu FH, Dong M. 2006.** A trade-off between guerrilla and phalanx growth forms in  
758 *Leymus secalinus* under different nutrient supplies. *Annals of Botany* **98**: 187–191.
- 759 **Younginger BS, Sirová D, Cruzan MB, Ballhorn DJ. 2017.** Is biomass a reliable estimate  
760 of plant fitness? *Applications in Plant Sciences* **5**: 1600094.
- 761
- 762

763 **Table 1.** Linear mixed-effects regression model describing the effect of rhizome mass (g),  
764 original (O) and cultivation (T) climate (temperature and moisture) and their interactions on  
765 rhizome length (mm). Genotype was used as a random factor in the model. Only effects of  
766 mass alone and in interaction with the other factors are shown here. Full results of the model  
767 are given in supplementary Table S2.1. Significant values ( $p < 0.05$ ) are shown in bold.

| <b>Fixed factors</b>          | <b>F value</b> | <b>P value</b>   |
|-------------------------------|----------------|------------------|
| <b>Mass</b>                   | <b>30.67</b>   | <b>&lt;0.001</b> |
| <b>Mass:Tmois</b>             | <b>9.37</b>    | <b>0.002</b>     |
| <b>Mass:Ttemp</b>             | <b>4.66</b>    | <b>0.031</b>     |
| Mass:Omois                    | 1.17           | 0.279            |
| Mass:Otemp                    | 2.53           | 0.112            |
| <b>Mass:Tmois:Ttemp</b>       | <b>4.65</b>    | <b>0.031</b>     |
| Mass:Tmois:Omois              | 2.80           | 0.095            |
| <b>Mass:Tmois:Otemp</b>       | <b>8.12</b>    | <b>0.004</b>     |
| Mass:Ttemp:Omois              | 3.29           | 0.070            |
| <b>Mass:Ttemp:Otemp</b>       | <b>5.03</b>    | <b>0.025</b>     |
| Mass:Omois:Otemp              | 0.42           | 0.518            |
| Mass:Tmois:Ttemp:Omois        | 1.55           | 0.213            |
| <b>Mass:Tmois:Ttemp:Otemp</b> | <b>6.45</b>    | <b>0.011</b>     |
| Mass:Tmois:Omois:Otemp        | 3.39           | 0.066            |
| Mass:Ttemp:Omois:Otemp        | 1.17           | 0.280            |

768

769



770 **Table 2.** Scaling exponent ( $\alpha$ ) and elevation ( $\beta$ ) for scaling relationship between rhizome  
771 length (mm) and rhizome mass (g) of *Festuca rubra*. The plants in different cultivation  
772 climates differ among each other in their scaling relationships. The value of scaling  
773 exponents in all the cases (presented in bold) were significantly greater than 1. 95%  
774 confidence intervals of  $\alpha$  and  $\beta$  are given in supplementary Table S2.2. The superscript letters  
775 represent significant differences in scaling exponent among cultivation climates.

| <b>Cultivation climate</b> | Scaling exponent         |                       | $R^2$ |
|----------------------------|--------------------------|-----------------------|-------|
|                            | ( $\alpha$ )             | Elevation ( $\beta$ ) |       |
| Cold_Dry                   | <b>1.099<sup>a</sup></b> | -2.768 <sup>a</sup>   | 0.925 |
| Cold_Wet                   | <b>1.203<sup>b</sup></b> | -2.904 <sup>b</sup>   | 0.846 |
| Warm_Dry                   | <b>1.042<sup>a</sup></b> | -2.768 <sup>a</sup>   | 0.935 |
| Warm_Wet                   | <b>1.217<sup>b</sup></b> | -2.981 <sup>b</sup>   | 0.849 |

776

777

778 **Table 3.** Scaling exponent ( $\alpha$ ) and elevation ( $\beta$ ) of scaling relationship between rhizome  
 779 length (mm) and rhizome mass (g) based on the origin climate and the cultivation climate. In  
 780 each case the value of  $R^2$  was  $> 0.647$ . The values of scaling exponents in bold are  
 781 significantly greater than 1. 95% confidence intervals of  $\alpha$  are given in supplementary Table  
 782 S2.3. \*\* represents that scaling exponents differs among original climates for plants grown in  
 783 the same cultivation climate (in the same column) and <sup>##</sup> represent that plants from the same  
 784 original climate differ in scaling exponent among different cultivation climates (in the same  
 785 row).

|                     | Cultivation climate |         |                     |         |                       |         |                     |         |
|---------------------|---------------------|---------|---------------------|---------|-----------------------|---------|---------------------|---------|
|                     | Cold_Dry<br>(T1_M1) |         | Cold_Wet<br>(T1_M4) |         | Warm_Dry<br>(T3_M1)** |         | Warm_Wet<br>(T3_M4) |         |
| Origin climate      | $\alpha$            | $\beta$ | $\alpha$            | $\beta$ | $\alpha$              | $\beta$ | $\alpha$            | $\beta$ |
| T1_M1               | 1.082               | -2.811  | <b>1.385</b>        | -2.993  | <b>1.183</b>          | -2.981  | <b>1.310</b>        | -3.063  |
| T1_M3               | 0.997               | -2.620  | <b>1.201</b>        | -2.906  | <b>1.156</b>          | -2.980  | <b>1.265</b>        | -2.994  |
| T1_M4               | 0.967               | -2.488  | <b>1.221</b>        | -2.952  | 1.005                 | -2.622  | 1.115               | -2.861  |
| T2_M1 <sup>##</sup> | 1.111               | -2.771  | <b>1.253</b>        | -2.884  | 0.982                 | -2.652  | <b>1.281</b>        | -2.986  |
| T2_M2               | 1.000               | -2.626  | 1.099               | -2.818  | <b>1.177</b>          | -2.951  | 1.214               | -3.036  |
| T2_M3               | 1.088               | -2.793  | <b>1.287</b>        | -2.988  | 1.034                 | -2.774  | <b>1.324</b>        | -3.072  |
| T2_M4 <sup>##</sup> | <b>1.296</b>        | -3.056  | <b>1.254</b>        | -2.988  | 0.903                 | -2.557  | <b>1.266</b>        | -3.081  |
| T3_M1               | 1.101               | -2.833  | 1.083               | -2.785  | 0.999                 | -2.733  | 1.006               | -2.734  |
| T3_M2               | 1.107               | -2.796  | 1.140               | -2.893  | 0.957                 | -2.658  | 1.147               | -2.944  |
| T3_M3               | 1.085               | -2.754  | 1.153               | -2.814  | 1.085                 | -2.799  | <b>1.199</b>        | -3.090  |
| T3_M4               | 1.102               | -2.731  | <b>1.395</b>        | -3.064  | 0.986                 | -2.660  | 1.066               | -2.647  |

786

787

788 **Table 4:** Linear mixed-effects regression model statistics describing the effect of rhizome  
789 mass (g), climate change (temperature and moisture) and their interactions on rhizome length  
790 (mm). Genotype was used as a random factor. Only effects of mass alone and its interaction  
791 with the other factors are shown here. Full results of the model are given in supplementary  
792 Table 2.4. Significant values ( $p < 0.05$ ) are shown in bold.

| <b>Fixed factors</b> | <b>F value</b> | <b>P value</b>    |
|----------------------|----------------|-------------------|
| Mass                 | <b>7853</b>    | <b>&lt; 0.001</b> |
| Mass:changeT         | 2.40           | 0.136             |
| Mass:changeM         | <b>20.51</b>   | <b>&lt;0.001</b>  |
| Mass:changeT:changeM | 3.83           | 0.059             |

793

794

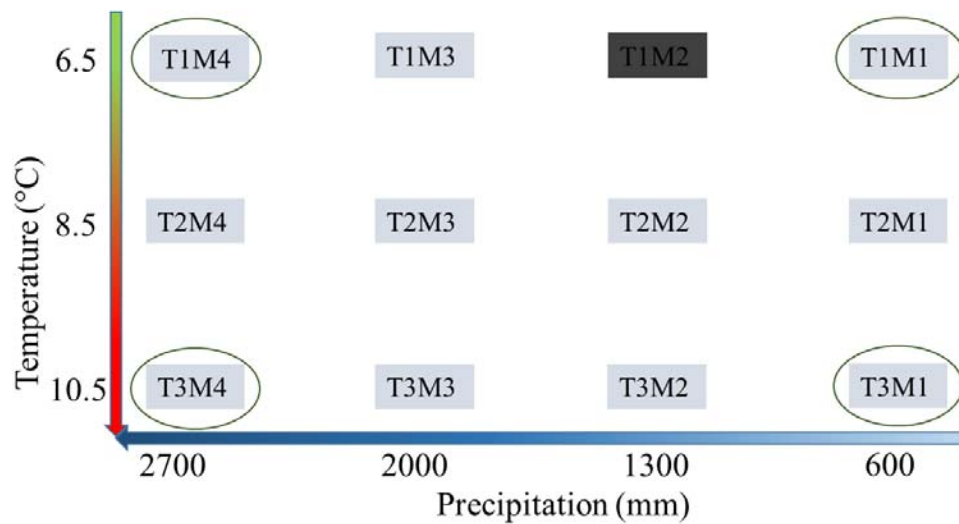

**Figure 1:** Representation of the climatic conditions of the localities from where the plant material was sampled. The four climates that are encircled were also used in climatic chambers as cultivation climates. The climatic condition in dark grey background (T1M2) was not used due to unavailability of the species. Temperature is mean for growing season and precipitation is annual.

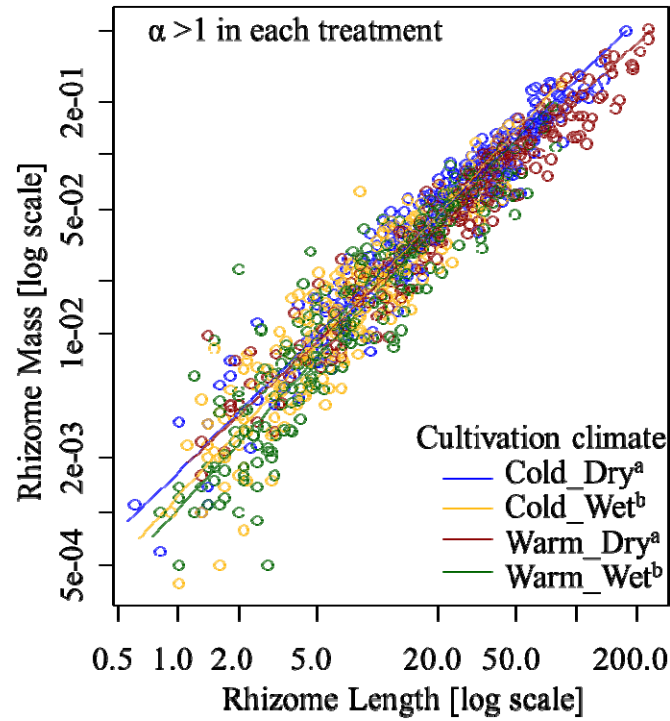

**Figure 2:** Relationship between rhizome length (mm) and mass (g) for plants from different cultivation climates. The superscript letters represent significant differences in scaling exponent among cultivation climates.

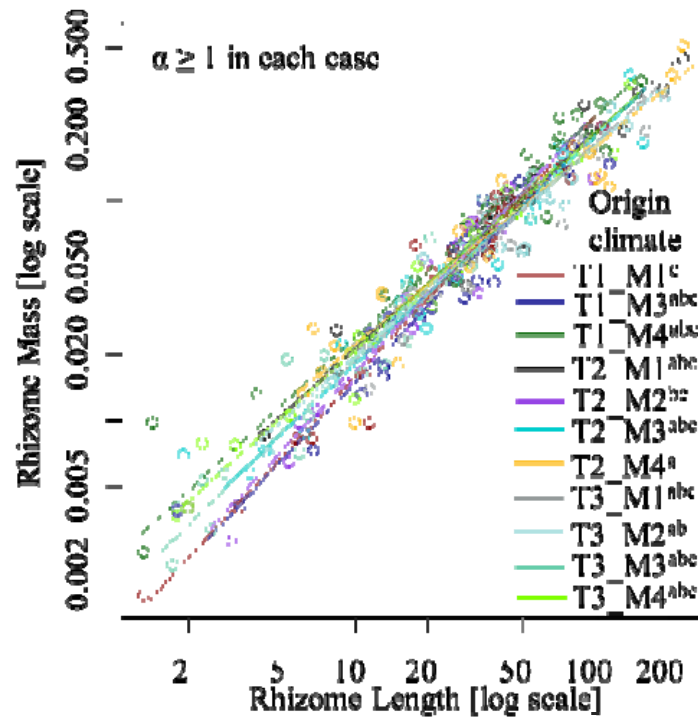

**Figure 3:** Differences in scaling exponent for the relationship between rhizome length (mm) and mass (g) among plants from different original climates grown under warm and dry cultivation climate. The plot is shown only for warm and dry cultivation climate because in other cultivation climates the scaling exponents were statistically not different among each other. T1 to T3 represent origin temperatures from low to high and M1 to M4 represent origin moistures from low to high (for details see Figure 1).

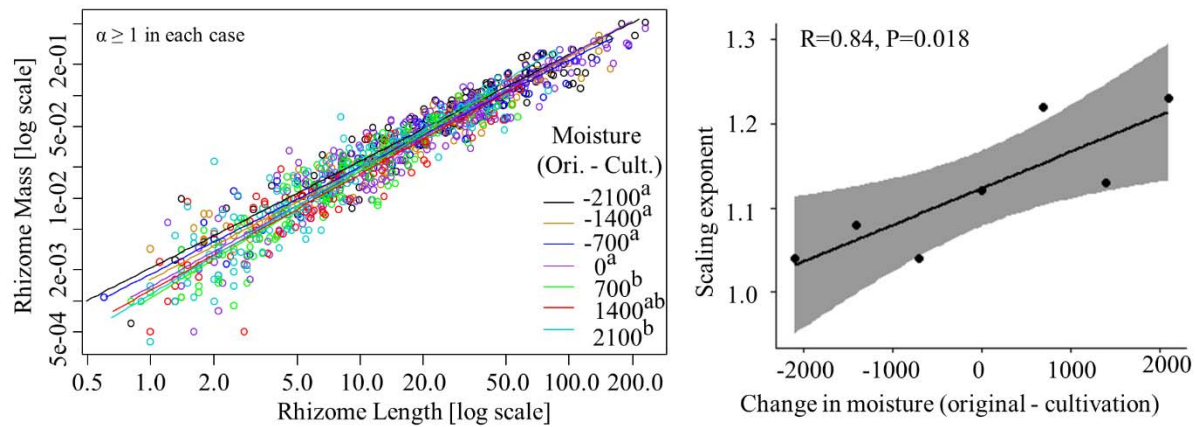

**Figure 4:** Figure in the left represents scaling relationship between rhizome length (mm) and mass (g) for plants cultivated under changed moisture (mm) conditions (differences in moisture between origin and cultivation climate). The superscript letters represent significant differences in scaling exponent. The right figure represents the change in scaling exponent with changes in moisture (original - cultivation).



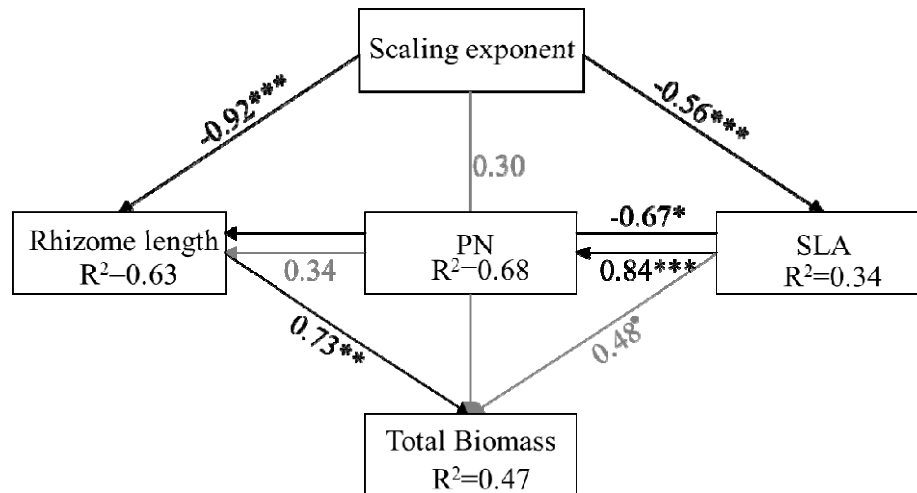

**Figure 5:** Structural equation model representing the effect of scaling exponent on traits related to plant fitness. PN = net photosynthetic rate, SLA = Specific leaf area (mm<sup>2</sup>/mg). Path coefficients between variables are unstandardized regression coefficients and part of the variances explained by the model (R<sup>2</sup>) are given under the variable names. The black arrows with regression coefficients in black letters are significant regressions ( $p \leq 0.05$ ), while those in grey are non-significant ( $p > 0.05$ ). \*\*\* indicates  $p < 0.001$ , \* indicates  $p < 0.05$  and • indicates  $p < 0.1$ . Goodness of fit statistics of the model are given in supplementary Table S2.5.
